# Supplementary material for: High-entropy oxide synthesis in concentrated alkaline solutions for plasma-catalytic formaldehyde oxidation
Source: Royal Society of Chemistry journal article supplement (doi:10.1039/d4ta06876a), 2024-12-04
Supplement: d4ta06876a1.pdf [file d4ta06876a1.pdf]

## Supporting information

### **High-Entropy Oxide Synthesis in Concentrated Alkaline Solutions for Plasma-Catalytic Formaldehyde Oxidation**

Xiaodong Liu<sup>a</sup>, Zijie Qin<sup>b</sup>, Rongrong Jia<sup>c</sup>, Liyi Shi<sup>a</sup>, Lei Huang<sup>a\*</sup>

<sup>a</sup> Research Center of Nano Science and Technology, College of Sciences, Shanghai University, Shanghai 200444, PR China

<sup>b</sup> Department of Chemistry, College of Sciences, Shanghai University, Shanghai 200444, PR China

<sup>c</sup> Department of physics, College of Sciences, Shanghai University, Shanghai 200444, PR China

\*Corresponding authors. leihuang@shu.edu.cn (L. Huang). Fax: +86-21-66137426;

Tel: +86-21-66137426.

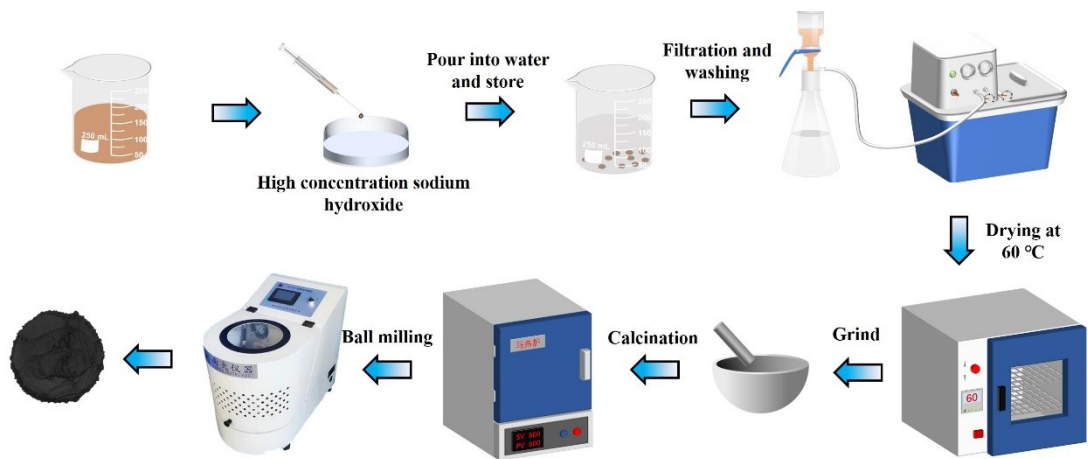

**Fig. S1** Process flow diagram for the preparation of HEO catalysts via high-concentration sodium hydroxide coprecipitation method

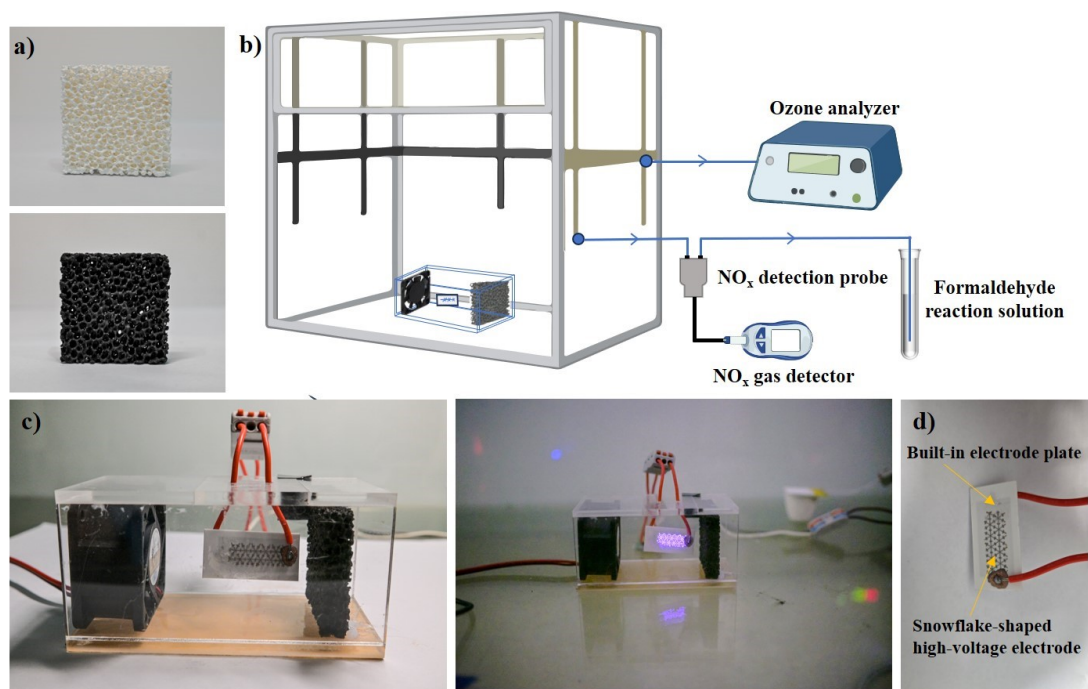

**Fig. S2** a) Blank foam ceramics and foam ceramics loaded with HEO catalysts, b) Schematic diagram of the plasma catalytic degradation experimental setup for HCHO, c) Plasma catalytic system and an operational plasma catalytic system, d) Discharge electrode.

a)

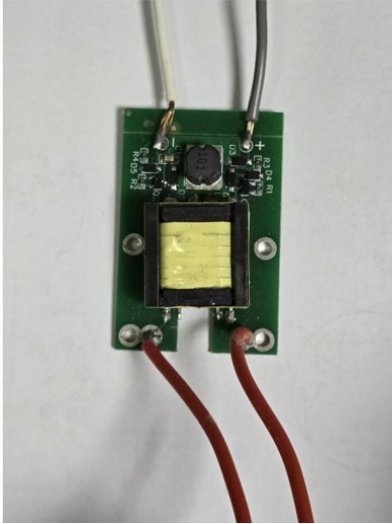

b)

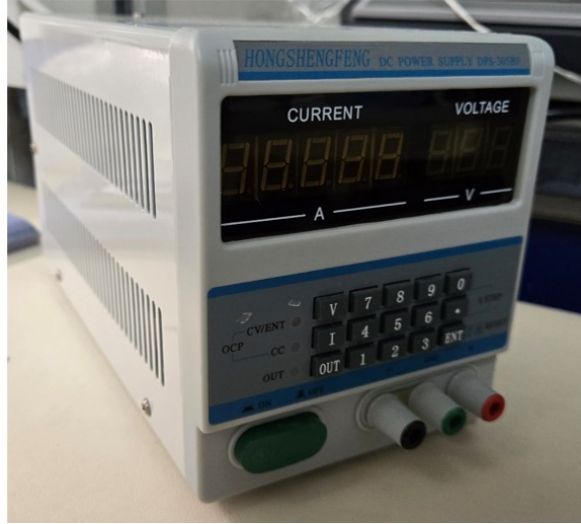

**Fig. S3** a) Self-oscillating transformer, b) DC regulated power supply.

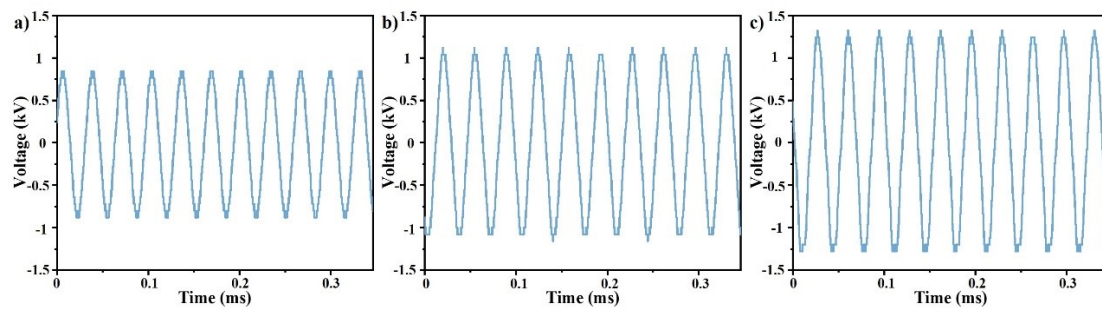

**Fig. S4** Waveforms under different output voltages: a) 1.2 kV, b) 1.4kV, c)1.6 kV.

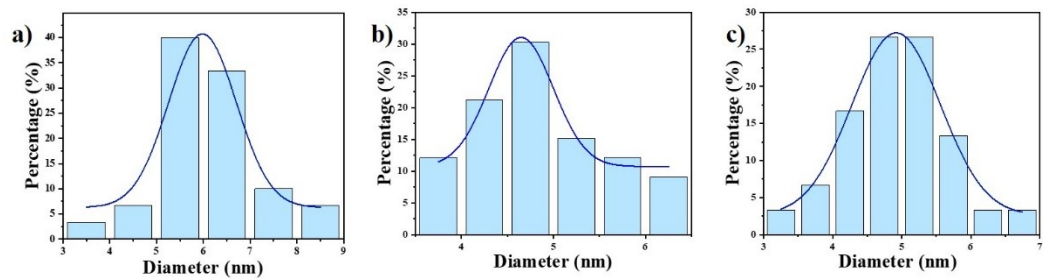

**Fig. S5** Particle size distribution histogram of HEO catalysts prepared with different concentrations of sodium hydroxide: a) HEO-2 %-400, c) HEO-10 %-400, i) HEO-20 %-400.

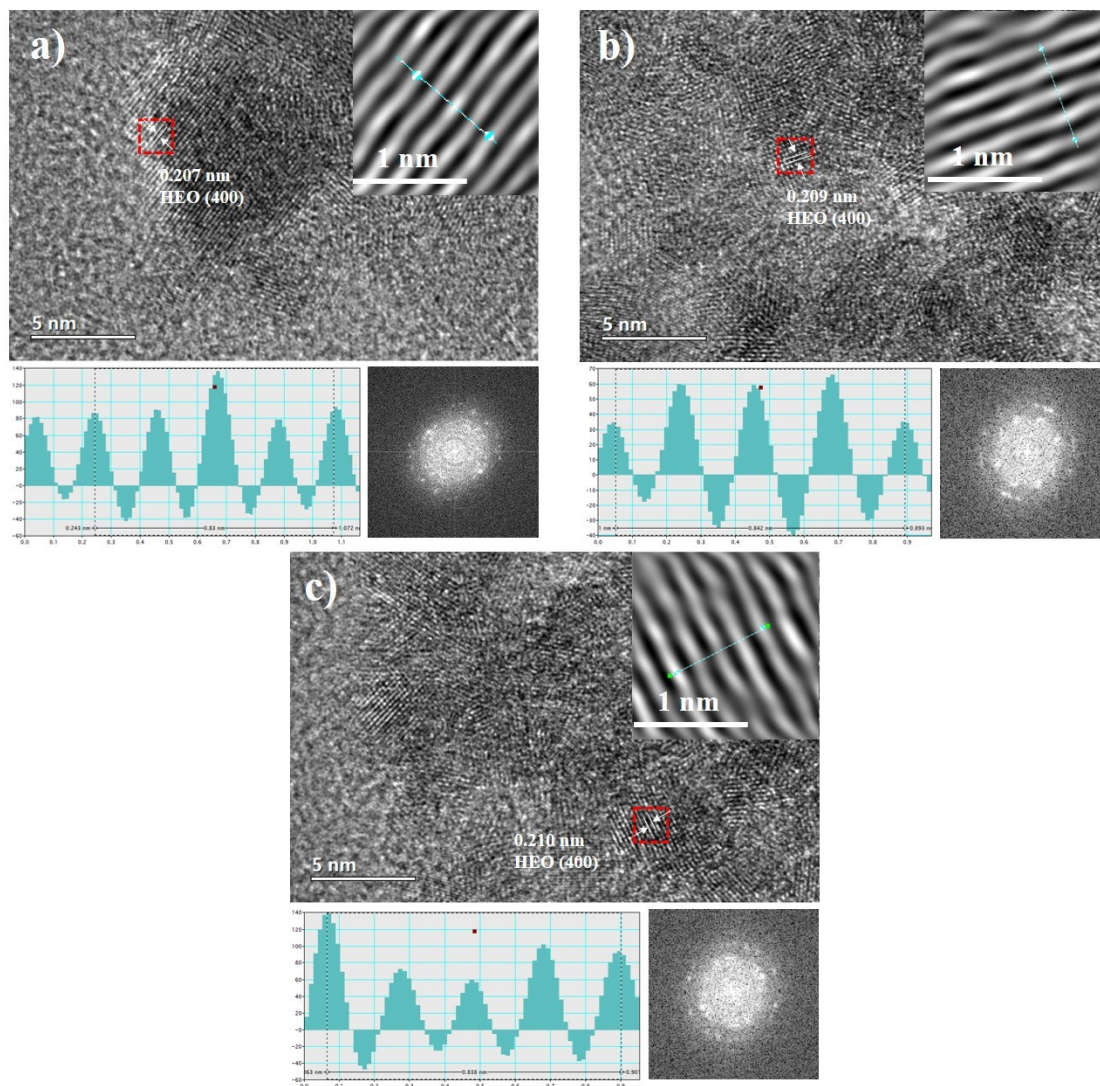

**Fig. S6** HRTEM images of HEOs prepared with different sodium hydroxide concentrations (the inset shows the lattice spacing measurement within the red box and the corresponding diffraction spot pattern): a) HEO-2%-400, b) HEO-10%-400, c) HEO-20%-400.

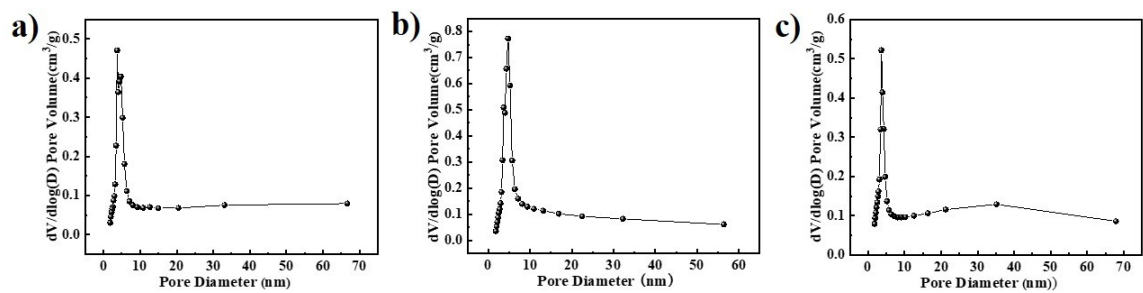

**Fig. S7** Pore size distribution curves: a) HEO-2 %-400, b) HEO-10 %-400, c) HEO-20 %-400.



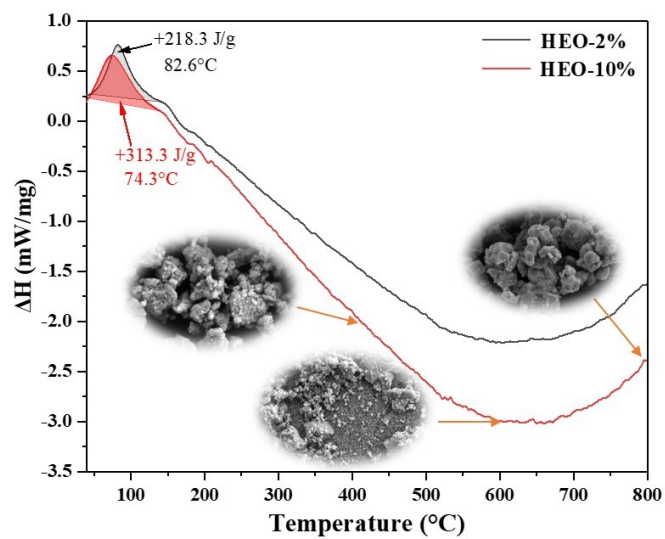

**Fig. S8** DSC analysis of phase transition in HEO catalyst at different temperatures.

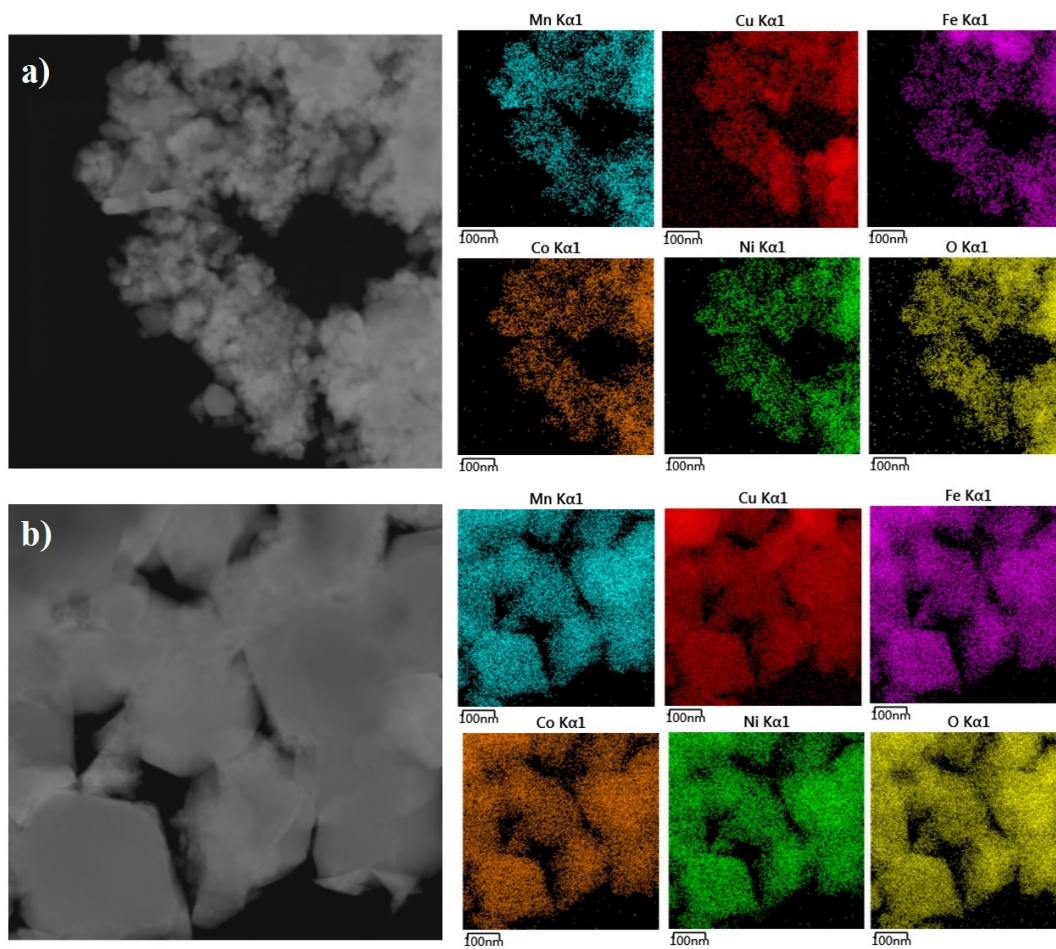

**Fig. S9** EDS elemental mapping images of the a) HEO-10 %-600, b) HEO-10 %-800.

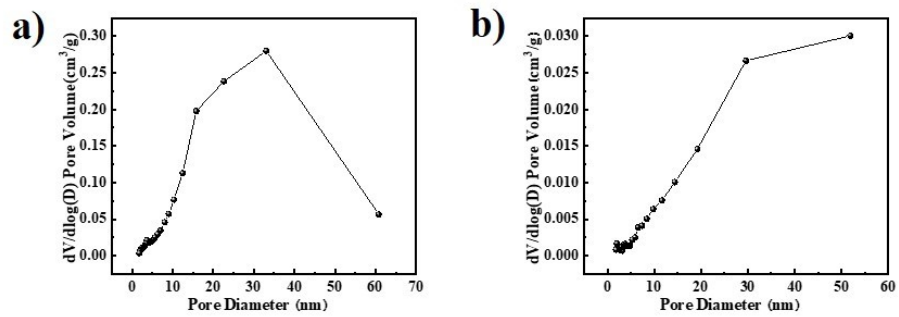

Fig. S10 Pore size distribution curves: a) HEO-10%-600, b) HEO-10%-800.

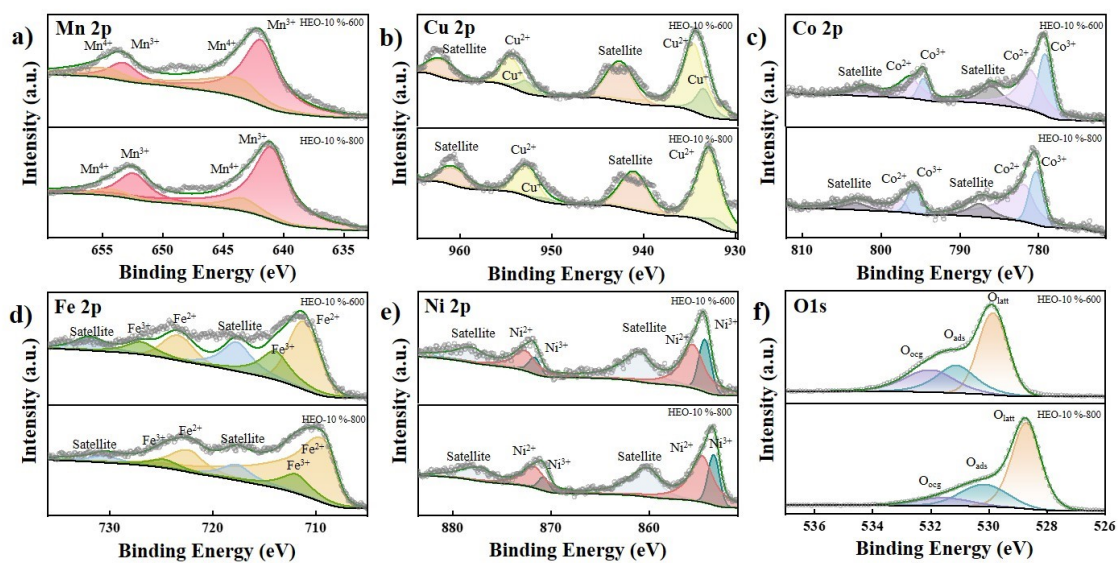

**Fig. S11** XPS spectra of HEO catalysts with different calcination temperatures: a) Mn 2p; b) Cu 2p; c) Co 2p; d) Fe 2p; e) Ni 2p; f) O 1s.

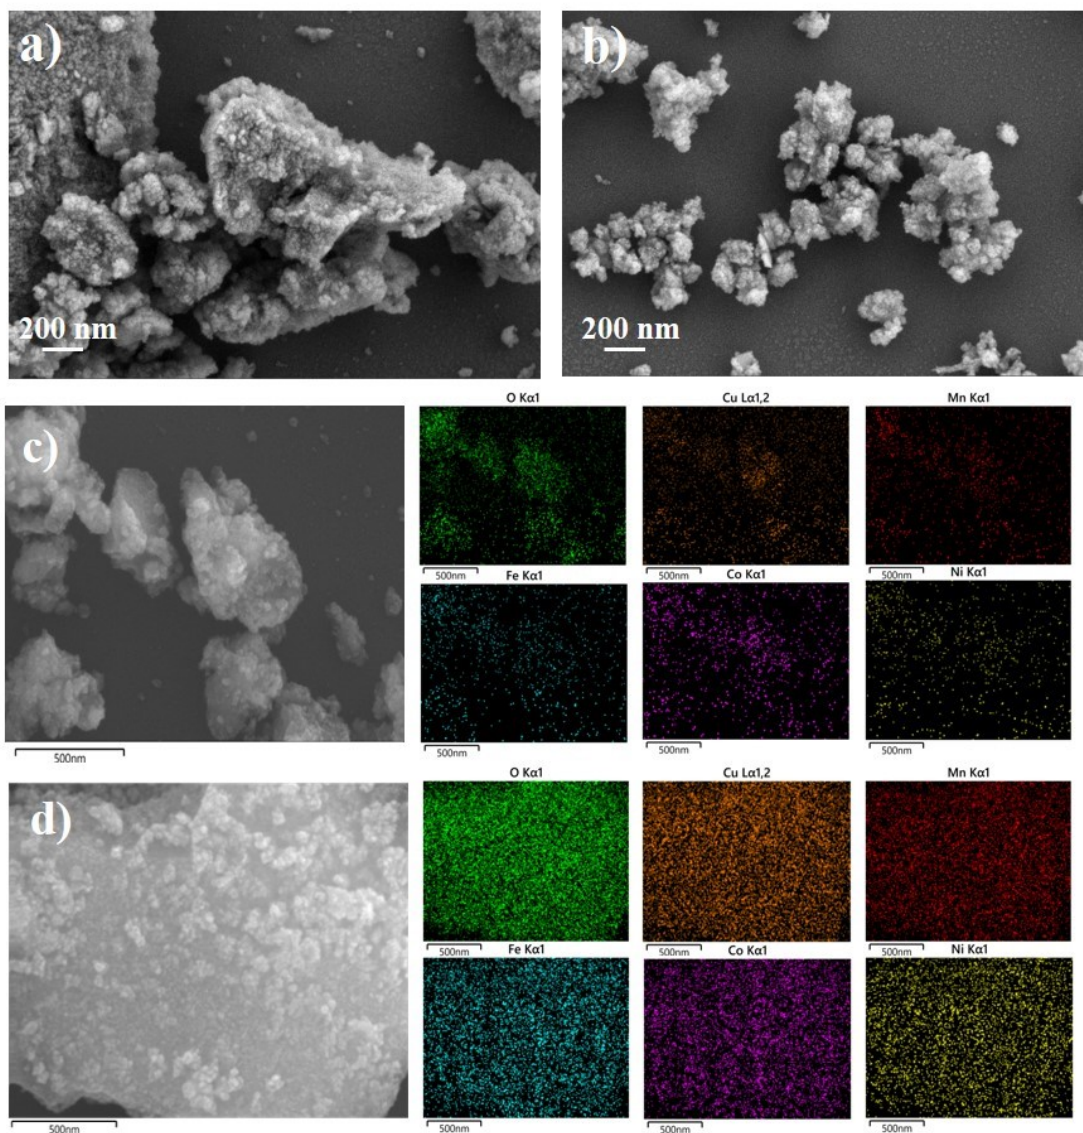

**Fig. S12** SEM images of the a) HEO-2% and b) HEO-10 %; EDS elemental mapping images of the c) HEO-2 %, d) HEO-10 %.

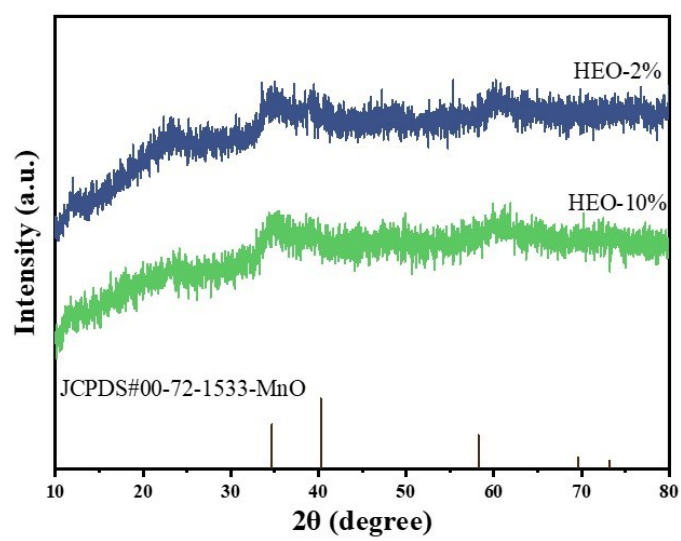

Fig. S13 XRD pattern of the naturally air-dried material.

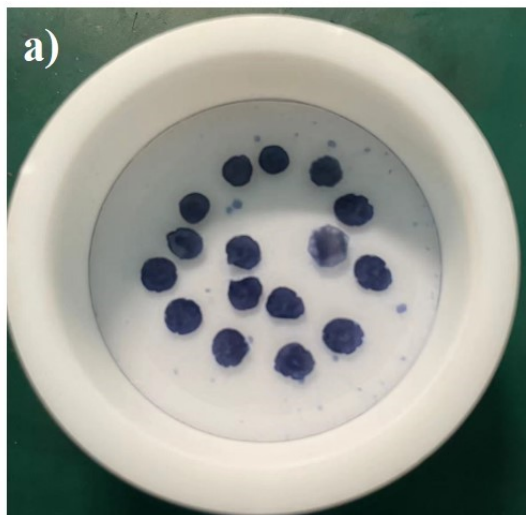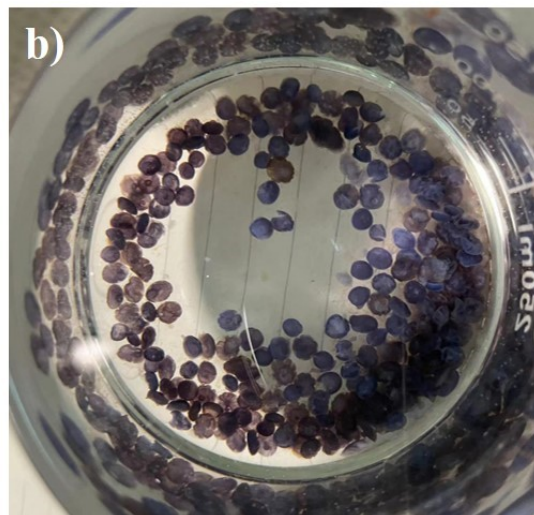

**Fig. S14** a) Precipitation reaction in a polytetrafluoroethylene container, b) Collected precipitate.

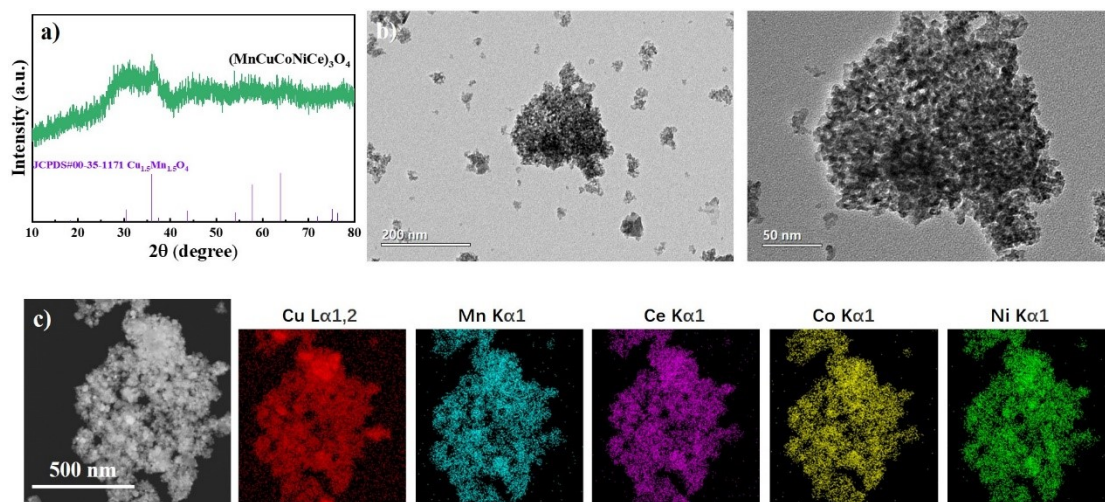

**Fig. S15**  $(\text{MnCuCoNiCe})_3\text{O}_4$ : a) XRD pattern, b) TEM image, c) EDS elemental mapping images.



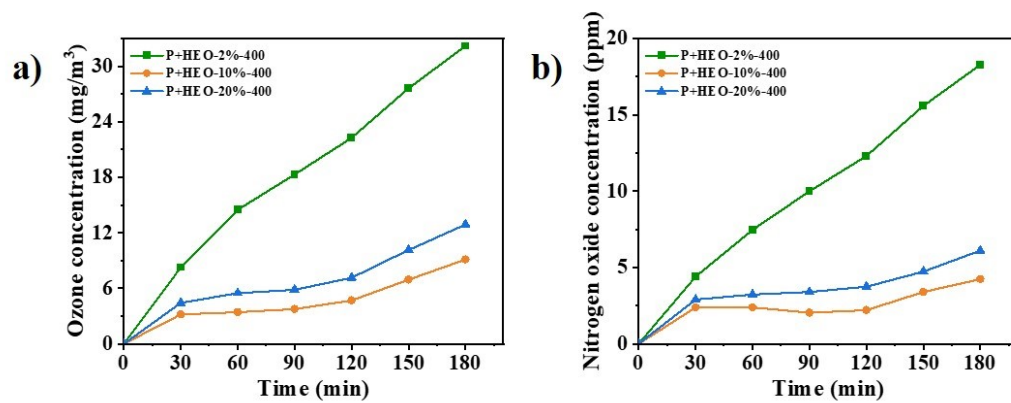

**Fig. S16** The by-product yield of HEO catalysts prepared under different conditions at 1.6 kV, 60% RH, and 18 m<sup>3</sup>/h gas flow rate: a) O<sub>3</sub> yield; b) NO<sub>x</sub> yield.

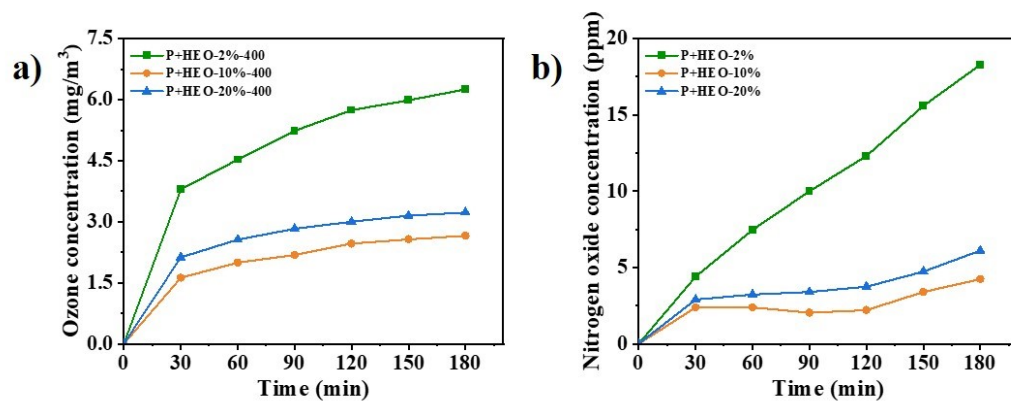

**Fig. S17** The by-product yield of HEO catalysts prepared under different conditions at 1.4 kV, 80% RH, and 18 m<sup>3</sup>/h gas flow rate: a) O<sub>3</sub> yield, b) NO<sub>x</sub> yield.

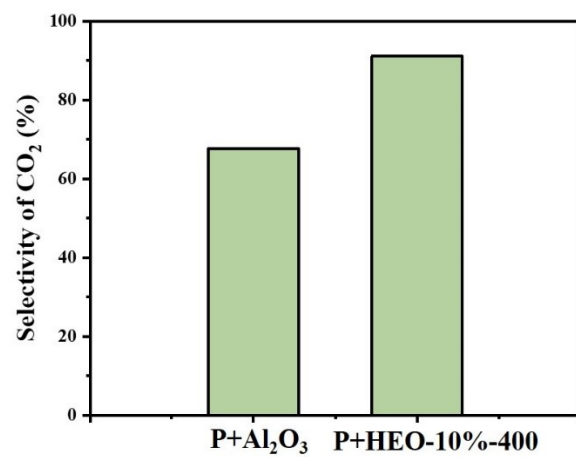

**Fig. S18** The CO<sub>2</sub> selectivity of different combinations.

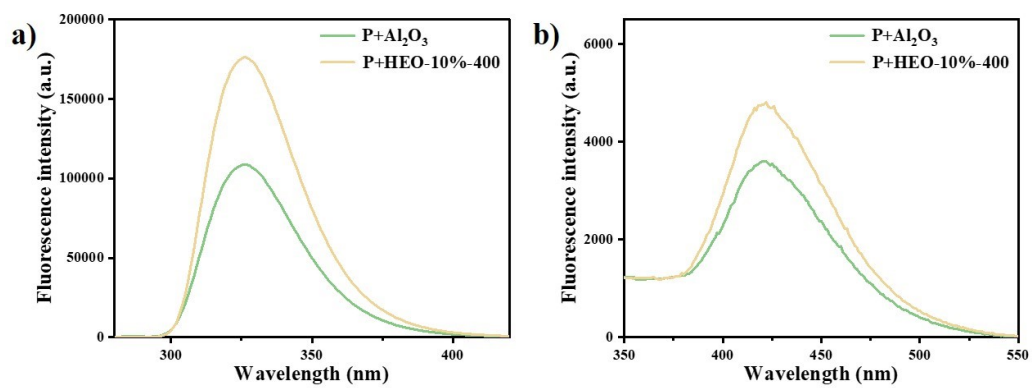

**Fig. S19** a) Fluorescence intensity plot of O<sub>2</sub><sup>-</sup> captured by different combinations  $\lambda_c=260$  nm, b) Fluorescence intensity plot of HO· captured by different combinations  $\lambda_c=315$  nm. Output voltage = 1.4 kV, Temperature = 25 °C, Humidity = 60 %RH.

**Table. S1** Plasma system electrical parameters

| DC Power Supply   |                   | Self-Excited Oscillation Transformer |                     | Discharge Ceramic Plate     |                             |
|-------------------|-------------------|--------------------------------------|---------------------|-----------------------------|-----------------------------|
| Input Voltage (V) | Input Current (A) | Output Voltage (kV)                  | Output Current (mA) | Positive Ion Count (*10000) | Negative Ion Count (*10000) |
| 6                 | 0.18              | 1.2                                  | 0.16                | 41                          | 39                          |
| 6.5               | 0.22              | 1.4                                  | 0.18                | 78                          | 79                          |
| 7                 | 0.26              | 1.6                                  | 0.21                | 114                         | 108                         |

**Table. S2** The results of the simulated crystalline size calculation.

| Sample    | HEO-2%-400 | HEO-10%-<br>400 | HEO-20%-<br>400 | HEO-10%-<br>600 | HEO-10%-<br>800 |
|-----------|------------|-----------------|-----------------|-----------------|-----------------|
| Size (nm) | 2.4        | 1.8             | 1.9             | 23.7            | 167.6           |

*K=0.9,  $\lambda=0.154$  nm*

**Table. S3** EDS elemental analysis results

| Elemental content (wt.%) | Mn   | Cu   | Co   | Fe   | Ni   |
|--------------------------|------|------|------|------|------|
| Sample                   |      |      |      |      |      |
| HEO-2 %-400              | 15.6 | 16.0 | 15.7 | 15.3 | 15.8 |
| HEO-10 %-400             | 15.7 | 16.2 | 15.8 | 15.4 | 15.7 |
| HEO-20 %-400             | 15.5 | 16.8 | 15.6 | 14.5 | 15.7 |

**Table. S4** Structural properties of synthesized HEO catalysts

| Sample       | Specific surface<br>area (m <sup>2</sup> /g) | pore volume<br>(cm <sup>3</sup> /g) | average pore<br>diameter (nm) |
|--------------|----------------------------------------------|-------------------------------------|-------------------------------|
| HEO-10 %-600 | 46                                           | 0.23                                | 19.7                          |
| HEO-10 %-800 | 8                                            | 0.04                                | 28.9                          |



**Table. S5** Summary table of XPS analysis results of HEO catalysts at different calcination temperatures

| Sample       | Mn <sup>3+</sup> /Mn <sup>4+</sup> | Cu <sup>+</sup> /Cu <sup>2+</sup> | Co <sup>2+</sup> /Co <sup>3+</sup> | Fe <sup>2+</sup> /Fe <sup>3+</sup> | Ni <sup>2+</sup> /Ni <sup>3+</sup> | $\frac{O_{ads}}{(O_{latt}+O_{ads})}$ |
|--------------|------------------------------------|-----------------------------------|------------------------------------|------------------------------------|------------------------------------|--------------------------------------|
| HEO-10 %-600 | 2.27                               | 0.21                              | 1.56                               | 1.88                               | 2.22                               | 0.33                                 |
| HEO-10 %-800 | 5.88                               | 0.10                              | 1.96                               | 3.65                               | 2.56                               | 0.29                                 |

**Table. S6** ICP test results for the content of each element

| Sample                                   | Element | theoretical content<br>(wt.%) | actual content<br>(wt.%) |
|------------------------------------------|---------|-------------------------------|--------------------------|
| (MnCuCoNiCe) <sub>3</sub> O <sub>4</sub> | Mn      | 15.8                          | 15.6                     |
|                                          | Cu      | 15.8                          | 15.5                     |
|                                          | Co      | 15.8                          | 15.7                     |
|                                          | Ni      | 15.8                          | 15.9                     |
|                                          | Ce      | 15.8                          | 16.2                     |
